# Supplementary material for: Correlation between frataxin expression and contractility revealed by in vitro Friedreich’s ataxia cardiac tissue models engineered from human pluripotent stem cells
Source: PubMed Central journal article supplement (PMC6615274; doi:10.1186/s13287-019-1305-y), 2019-07-08
Supplement: 13287_2019_1305_MOESM1_ESM.pdf [file 13287_2019_1305_MOESM1_ESM.pdf]

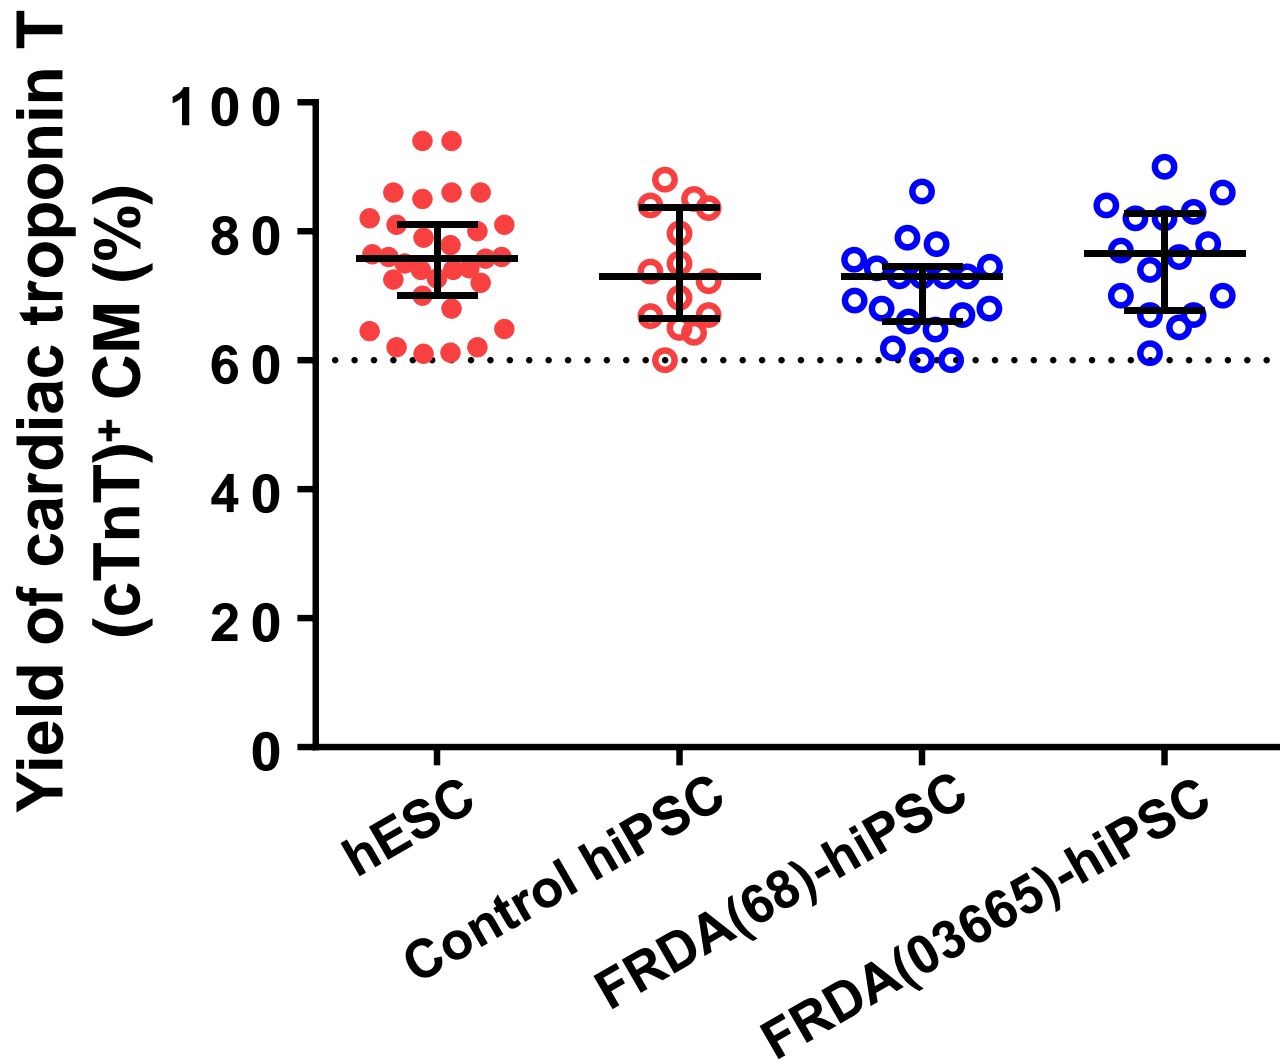

|                                                       |                                                          | <b>Lv-shNT hESC</b> | <b>Lv-shFXN hESC</b> | <b>Control hiPSC</b> | <b>FRDA hiPSC</b>  |
|-------------------------------------------------------|----------------------------------------------------------|---------------------|----------------------|----------------------|--------------------|
| Upstroke velocity                                     | Fluorescence intensity change/<br>time ( $\Delta F/ms$ ) | $0.023 \pm 0.001$   | $0.018 \pm 0.002$    | $0.032 \pm 0.002$    | $0.038 \pm 0.003$  |
| Decay velocity                                        |                                                          | $-0.016 \pm 0.001$  | $-0.012 \pm 0.001$   | $-0.019 \pm 0.001$   | $-0.020 \pm 0.001$ |
| Longitudinal conduction velocity                      | cm/s                                                     | $6.32 \pm 0.35$     | $5.17 \pm 0.30$      | $2.76 \pm 0.23$      | $9.10 \pm 0.69$    |
| Transverse conduction velocity                        |                                                          | $2.77 \pm 0.15$     | $2.16 \pm 0.16$      | $0.95 \pm 0.03$      | $4.32 \pm 0.39$    |
| Anisotropic ratio                                     |                                                          | $2.49 \pm 0.14$     | $2.62 \pm 0.14$      | $2.95 \pm 0.26$      | $2.40 \pm 0.16$    |
| Preparations with spontaneous action potential firing |                                                          | 3.1 %               | 18.2 %               | 60.0 %               | 13.3 %             |
| Preparations with spiral reentrance                   |                                                          | 6.3 %               | 9.1 %                | 40.0 %               | 3.3 %              |
